# Supplementary material for: Families in the COVID-19 pandemic: parental stress, parent mental health and the occurrence of adverse childhood experiences—results of a representative survey in Germany
Source: Springer Nature journal article supplement (doi:10.1007/s00787-021-01739-0), 2021-03-01
Supplement: MOESM4 [file 18915368]

Article title: Families in the COVID-19 Pandemic: Parental Stress, Parent Mental Health and the Occurrence of Adverse Childhood Experiences: Results of a Representative Survey in Germany

Journal: European Child & Adolescent Psychiatry

Authors: Claudia Calvano PhD<sup>1</sup>, Lara Engelke MSc<sup>2</sup>, Jessica Di Bella PhD<sup>1</sup>, Jana Kindermann MSc<sup>1</sup>, Babette Renneberg PhD<sup>2\*</sup>, & Sibylle M. Winter MD<sup>1\*</sup>  
\*shared senior authors

Affiliations: <sup>1</sup>Charité - Universitätsmedizin Berlin, Corporate Member of Freie Universität Berlin, Humboldt-Universität zu Berlin, Berlin Institute of Health (BIH)  
Department of Child and Adolescent Psychiatry, Psychosomatics and Psychotherapy  
<sup>2</sup>Freie Universitaet of Berlin, Department of Clinical Psychology and Psychotherapy

**Corresponding author:** Claudia Calvano, PhD, Email: [claudia.calvano@charite.de](mailto:claudia.calvano@charite.de)

**Supplementary Material 4**

**Table S4**

**Group differences in change of ACEs on parent outcomes**

|     | Increase    | Pandemic-related stress |         | Parental stress |         | General stress |         | Subjective health |         | Anxiety     |         | Depression  |         |
|-----|-------------|-------------------------|---------|-----------------|---------|----------------|---------|-------------------|---------|-------------|---------|-------------|---------|
|     |             | M (SD)                  | d       | M (SD)          | d       | M (SD)         | d       | M (SD)            | d       | M (SD)      | d       | M (SD)      | d       |
| WDV | no (n=236)  | 31.98 (9.12)            | 0.46*** | 37.64 (9.35)    | 0.72*** | 6.33 (4.29)    | 0.66*** | 6.59 (2.13)       | 0.50*** | 1.11 (1.09) | 0.46*** | 1.38 (1.18) | 0.52*** |
|     | yes (n=97)  | 36.41 (10.65)           |         | 44.51 (10.03)   |         | 9.03 (3.62)    |         | 5.53 (2.14)       |         | 1.64 (1.31) |         | 1.98 (1.13) |         |
| VEA | no (n=192)  | 31.16 (9.79)            | 0.45*** | 37.22 (9.03)    | 0.88*** | 5.46 (3.91)    | 0.54*** | 6.76 (2.03)       | 0.35**  | 1.09 (1.22) | 0.17    | 1.27 (1.21) | 0.40*** |
|     | yes (n=140) | 35.69 (10.48)           |         | 45.22 (9.12)    |         | 7.66 (4.23)    |         | 5.99 (2.43)       |         | 1.29 (1.16) |         | 1.77 (1.34) |         |
| NEA | no (n=37)   | 34.30 (12.99)           | 0.32    | 35.05 (9.25)    | 0.88*** | 6.93 (4.78)    | 0.31    | 6.13 (2.24)       | 0.16    | 1.25 (1.39) | 0.33    | 1.58 (1.20) | 0.25    |
|     | yes (n=45)  | 37.91 (9.45)            |         | 45.17 (11.12)   |         | 8.26 (3.98)    |         | 5.74 (2.53)       |         | 1.68 (1.20) |         | 1.86 (1.05) |         |
| EN  | no (n=94)   | 35.81 (9.90)            | 0.30    | 39.00 (11.60)   | 0.35*   | 6.35 (4.51)    | 0.24    | 6.43 (2.22)       | 0.16    | 1.20 (1.13) | 0.14    | 1.39 (1.17) | 0.24    |
|     | yes (n=65)  | 39.14 (12.47)           |         | 43.26 (12.88)   |         | 7.46 (4.93)    |         | 6.04 (2.70)       |         | 1.37 (1.40) |         | 1.68 (1.32) |         |
| PA  | no (n=40)   | 30.87 (8.19)            | 0.63*   | 44.49 (10.05)   | 1.04*** | 7.47 (3.67)    | 0.46    | 5.67 (2.22)       | 0.34    | 1.36 (1.10) | 0.64*   | 1.81 (0.97) | 0.39    |
|     | yes(n=17)   | 37.00 (12.68)           |         | 54.21 (7.44)    |         | 9.42 (5.41)    |         | 4.89 (2.40)       |         | 2.11 (1.32) |         | 2.22 (1.21) |         |

Families in the COVID-19 pandemic – Supplementary Material 4

|     | Increase   | Pandemic-related stress |         | Parental stress |         | General stress |         | Subjective health |        | Anxiety     |         | Depression  |        |
|-----|------------|-------------------------|---------|-----------------|---------|----------------|---------|-------------------|--------|-------------|---------|-------------|--------|
|     |            | M (SD)                  | d       | M (SD)          | d       | M (SD)         | d       | M (SD)            | d      | M (SD)      | d       | M (SD)      | d      |
| SN  | no (n=57)  | 34.79 (9.27)            | 0.45*   | 41.08 (11.23)   | 0.09    | 7.35 (4.39)    | 0.30    | 6.35 (2.58)       | 0.36   | 1.21 (1.08) | 0.31    | 1.75 (1.30) | 0.01   |
|     | yes (n=39) | 39.14 (10.13)           |         | 42.00 (9.08)    |         | 8.81 (5.39)    |         | 5.45 (2.30)       |        | 1.59 (1.41) |         | 1.75 (1.15) |        |
| MI  | no (n=101) | 31.91 (8.95)            | 0.81*** | 38.52 (9.64)    | 1.04*** | 7.79 (3.96)    | 0.65*** | 5.79 (2.21)       | 0.61** | 1.41 (1.12) | 0.99*** | 1.84 (1.21) | 0.54** |
|     | yes (n=41) | 39.78 (11.33)           |         | 47.67 (10.06)   |         | 10.35 (3.82)   |         | 4.37 (2.57)       |        | 2.53 (1.14) |         | 2.50 (1.22) |        |
| AS  | no (n=31)  | 37.23 (10.88)           | 0.59    | 43.12 (10.56)   | 0.89*   | 8.15 (4.35)    | 0.45    | 6.32 (2.36)       | 0.64   | 1.44 (1.24) | 1.42**  | 1.69 (1.20) | 0.74   |
|     | yes (n=6)  | 31.00 (7.96)            |         | 52.86 (13.33)   |         | 10.00 (2.45)   |         | 4.86 (1.68)       |        | 3.14 (0.90) |         | 2.57 (1.13) |        |
| SEV | no (n=43)  | 35.49 (10.60)           | 0.44    | 42.58 (11.48)   | 0.64*   | 8.38 (4.07)    | 0.11    | 6.18 (2.10)       | 0.48   | 1.45 (1.17) | 0.66*   | 1.69 (1.22) | 0.28   |
|     | yes n=(23) | 40.35 (11.85)           |         | 49.54 (9.80)    |         | 8.85 (4.99)    |         | 5.08 (2.67)       |        | 2.28 (1.43) |         | 2.04 (1.31) |        |

Notes. WDV = witnessing domestic violence, VEA = verbal emotional abuse, NEA = nonverbal emotional abuse, EN = emotional neglect, PA = physical abuse, SN = supervisory neglect, MI = mental illness in the household, AS = alcohol or substance abuse in the household; SEV = severe forms of ACEs like maltreatment, neglect, violence; d = Cohen's d for effect size (d=0.2 small, d = 0.5 medium, d =.08 large); \* p < .05, \*\* p < .01, \*\*\* p = .001.
