# Supplementary material for: Families in the COVID-19 pandemic: parental stress, parent mental health and the occurrence of adverse childhood experiences—results of a representative survey in Germany
Source: Springer Nature journal article supplement (doi:10.1007/s00787-021-01739-0), 2021-03-01
Supplement: MOESM5 [file 18915368]

Article title: Families in the COVID-19 Pandemic: Parental Stress, Parent Mental Health and the Occurrence of Adverse Childhood Experiences: Results of a Representative Survey in Germany

Journal: European Child & Adolescent Psychiatry

Authors: Claudia Calvano PhD<sup>1</sup>, Lara Engelke MSc<sup>2</sup>, Jessica Di Bella PhD<sup>1</sup>, Jana Kindermann MSc<sup>1</sup>, Babette Renneberg PhD<sup>2\*</sup>, & Sibylle M. Winter MD<sup>1\*</sup>

\*shared senior authors

Affiliations: <sup>1</sup> Charité - Universitätsmedizin Berlin, Corporate Member of Freie Universität Berlin, Humboldt-Universität zu Berlin, Berlin Institute of Health (BIH)  
Department of Child and Adolescent Psychiatry, Psychosomatics and Psychotherapy  
<sup>2</sup> Freie Universitaet of Berlin, Department of Clinical Psychology and Psychotherapy

**Corresponding author:** Claudia Calvano, PhD, Email: claudia.calvano@charite.de

## Supplementary Material 5

### Factors associated with an increase in ACEs

The following risk factors were tested for an increase vs. decrease/no change in witnessing domestic violence (n=97 increase) and verbal emotional abuse (n=140 increase): sociodemographic factors (parent age, parent sex, number of children, average child age, single parenting, SES index), parent-related risk factors (parental alcohol abuse, parent mental disorder, parental history of physical or sexual abuse in childhood or adolescence, parental experience of physical or sexual violence in adulthood), and pandemic-related risk factors (parent among the risk group for COVID-19, short-time work, loss of job, severe financial loss). Results for parent age, child age and the number of children in the household are summarized in Table S5a, results for categorial risk factors are summarized in Table S5b.

**Table S5a**

**Differences in parent and child age for witnessing domestic violence and verbal emotional abuse**

|                    | Witnessing domestic violence          |                            |       | Verbal emotional abuse                  |                             | p     |
|--------------------|---------------------------------------|----------------------------|-------|-----------------------------------------|-----------------------------|-------|
|                    | decrease/no change<br>n=236<br>M (SD) | increase<br>n=97<br>M (SD) | p     | decrease / no change<br>n=192<br>M (SD) | increase<br>n=140<br>M (SD) |       |
| Parent age         | 41.70 (7.91)                          | 39.69 (7.26)               | .032  | 42.33 (7.71)                            | 39.62 (7.00)                | .001  |
| Child age          | 10.18 (4.88)                          | 8.10 (4.54)                | <.001 | 10.17 (4.75)                            | 7.82 (4.26)                 | <.001 |
| Number of children | 1.73 (0.83)                           | 1.76 (0.75)                | .763  | 1.83 (0.80)                             | 1.86 (0.72)                 | .719  |

**Table S5b**

**Differences in categorial risk factors for witnesses of domestic violence and verbal emotional abuse**

|                                       |                 | witnessing domestic violence |      | verbal emotional abuse                |                 |       |      |
|---------------------------------------|-----------------|------------------------------|------|---------------------------------------|-----------------|-------|------|
|                                       |                 | increase                     | p    | increase                              |                 | p     |      |
| <b>Sociodemographic risk factors</b>  |                 |                              |      | <b>Sociodemographic risk factors</b>  |                 |       |      |
| Parent sex                            | mothers (n=192) | 26.0%                        | .176 | Parent sex                            | mothers (n=184) | 41.3% | .722 |
|                                       | fathers (n=140) | 32.9%                        |      |                                       | fathers (n=148) | 43.2% |      |
| Single parenting                      | yes (n=46)      | 19.6%                        | .855 | Single parenting                      | yes (n=43)      | 51.2% | .361 |
|                                       | no (n=9)        | 22.2%                        |      |                                       | no (n=4)        | 75.0% |      |
| SES <sup>a</sup>                      | low (n=38)      | 15.8%                        | .121 | SES <sup>a</sup>                      | low (n=28)      | 28.6% | .048 |
|                                       | medium (n=193)  | 32.1%                        |      |                                       | medium (n=185)  | 48.1% |      |
|                                       | high (n=101)    | 27.7%                        |      |                                       | high (n=119)    | 37.0% |      |
| <b>Pandemic-specific risk factors</b> |                 |                              |      | <b>Pandemic-specific risk factors</b> |                 |       |      |
| Job loss                              | yes (n=31)      | 48.4%                        | .013 | Job loss                              | yes (n=29)      | 62.1% | .024 |
|                                       | no (n=302)      | 27.2%                        |      |                                       | no (n=304)      | 40.5% |      |
| Financial loss                        | yes (n=101)     | 32.7%                        | .360 | Financial loss                        | yes (n=83)      | 53.0% | .021 |
|                                       | no (n=231)      | 27.7%                        |      |                                       | no (n=249)      | 38.6% |      |

|                                               |                           | witnessing domestic violence |      |                                               |                           | verbal emotional abuse |      |
|-----------------------------------------------|---------------------------|------------------------------|------|-----------------------------------------------|---------------------------|------------------------|------|
|                                               |                           | increase                     | p    |                                               |                           | increase               | p    |
| Reduced working hours                         | yes (n=107)<br>no (n=226) | 32.7%<br>27.4%               | .322 | Reduced working hours                         | yes (n=109)<br>no (n=223) | 45.9%<br>40.4%         | .339 |
| Parent among COVID-19 risk group <sup>b</sup> | yes (n=47)<br>no (n=13)   | 34.0%<br>38.5%               | .733 | Parent among COVID-19 risk group <sup>b</sup> | yes (n=38)<br>no (n=13)   | 47.4%<br>61.5%         | .378 |
| <b>Parent-related risk factors</b>            |                           |                              |      | <b>Parent-related risk factors</b>            |                           |                        |      |
| Parental history of child abuse               | yes (n=111)<br>no (n=221) | 37.8%<br>24.9%               | .014 | Parental history of child abuse               | yes (n=106)<br>no (n=226) | 49.1%<br>38.9%         | .082 |
| Parental Experience of violence               | yes (n=58)<br>no (n=273)  | 31.0%<br>28.6%               | .707 | Parental experience of violence               | yes (n=52)<br>no (n=279)  | 61.5%<br>38.7%         | .002 |
| Parental mental disorder                      | yes (n=61)<br>no (n=271)  | 36.1%<br>27.7%               | .193 | Parental mental disorder                      | yes (n=50)<br>no (n=282)  | 54.0%<br>40.1%         | .066 |
| Parental risk for alcohol abuse <sup>c</sup>  | yes (n=28)<br>no (n=304)  | 35.7%<br>28.6%               | .429 | Parental risk for alcohol abuse <sup>c</sup>  | yes (n=22)<br>no (n=309)  | 45.5%<br>42.1%         | .756 |

Notes. <sup>a</sup>according to Winkler-Index [1]; risk group of severe COVID-19 according to Clark et al. [2]; parental risk for alcohol abuse according to PHQ-D [3].

### References Supplementary Material 5

- Lampert T, Müters S, Stolzenberg H, Kroll LE, Group KS (2014) Messung des sozioökonomischen Status in der KiGGS-Studie. Bundesgesundheitsblatt-Gesundheitsforschung-Gesundheitsschutz 57 (7):762-770
- Löwe B, Spitzer RL, Zipfel S, Herzog W (2002) PHQ-D: Gesundheitsfragebogen für Patienten; Manual Komplettversion und Kurzform. Pfizer GmbH
- Clark A, Jit M, Warren-Gash C, Guthrie B, Wang HHX, Mercer SW, Sanderson C, McKee M, Troeger C, Ong KL, Checchi F, Perel P, Joseph S, Gibbs HP, Banerjee A, Eggo RM, Nightingale ES, O'Reilly K, Jombart T, Edmunds WJ, Rosello A, Sun FY, Atkins KE, Bosse NI, Clifford S, Russell TW, Deol AK, Liu Y, Procter SR, Leclerc QJ, Medley G, Knight G, Munday JD, Kucharski AJ, Pearson CAB, Klepac P, Prem K, Houben RMGJ, Endo A, Flasche S, Davies NG, Diamond C, van Zandvoort K, Funk S, Auzenbergs M, Rees EM, Tully DC, Emery JC, Quilty BJ, Abbott S, Villabona-Arenas CJ, Hué S, Hellewell J, Gimma A, Jarvis CI (2020) Global, regional, and national estimates of the population at

increased risk of severe COVID-19 due to underlying health conditions in 2020: a modelling study. *Lancet Glob Health* 8 (8):e1003-e1017. doi:[https://doi.org/10.1016/S2214-109X\(20\)30264-3](https://doi.org/10.1016/S2214-109X(20)30264-3)
